# Supplementary material for: Central role of the proximal tubular αKlotho/FGF receptor complex in FGF23-regulated phosphate and vitamin D metabolism
Source: PubMed Central journal article supplement (PMC5932018; doi:10.1038/s41598-018-25087-3), 2018-05-02
Supplement: 41598_2018_25087_MOESM1_ESM.pdf [file 41598_2018_25087_MOESM1_ESM.pdf]

Supplementary information

## **Central role of the proximal tubular $\alpha$ Klotho/FGF receptor complex in FGF23-regulated phosphate and vitamin D metabolism**

Ai Takeshita<sup>1</sup>, Kazuki Kawakami<sup>1</sup>, Kenryo Furushima<sup>1</sup>, Masayasu Miyajima<sup>2</sup>, and Kazushige Sakaguchi<sup>1\*</sup>

<sup>1</sup>Department of Molecular Cell Biology and Molecular Medicine, Institute of Advanced Medicine, Wakayama

Medical University, 811-1 Kimiidera, Wakayama 641-8509, Japan

<sup>2</sup>Laboratory Animal Center, Wakayama Medical University, 811-1 Kimiidera, Wakayama 641-8509, Japan

\*Correspondence and material requests should be addressed to K.S. ([ksaka@wakayama-med.ac.jp](mailto:ksaka@wakayama-med.ac.jp))

Table of contents:

Supplementary Figure S1

Supplementary Figure S2

Supplementary Figure S3

Supplementary Figure S4

Supplementary Figure S5

Supplementary Table S1

Supplementary Table S2

Supplementary Table S3

Supplementary Table S4

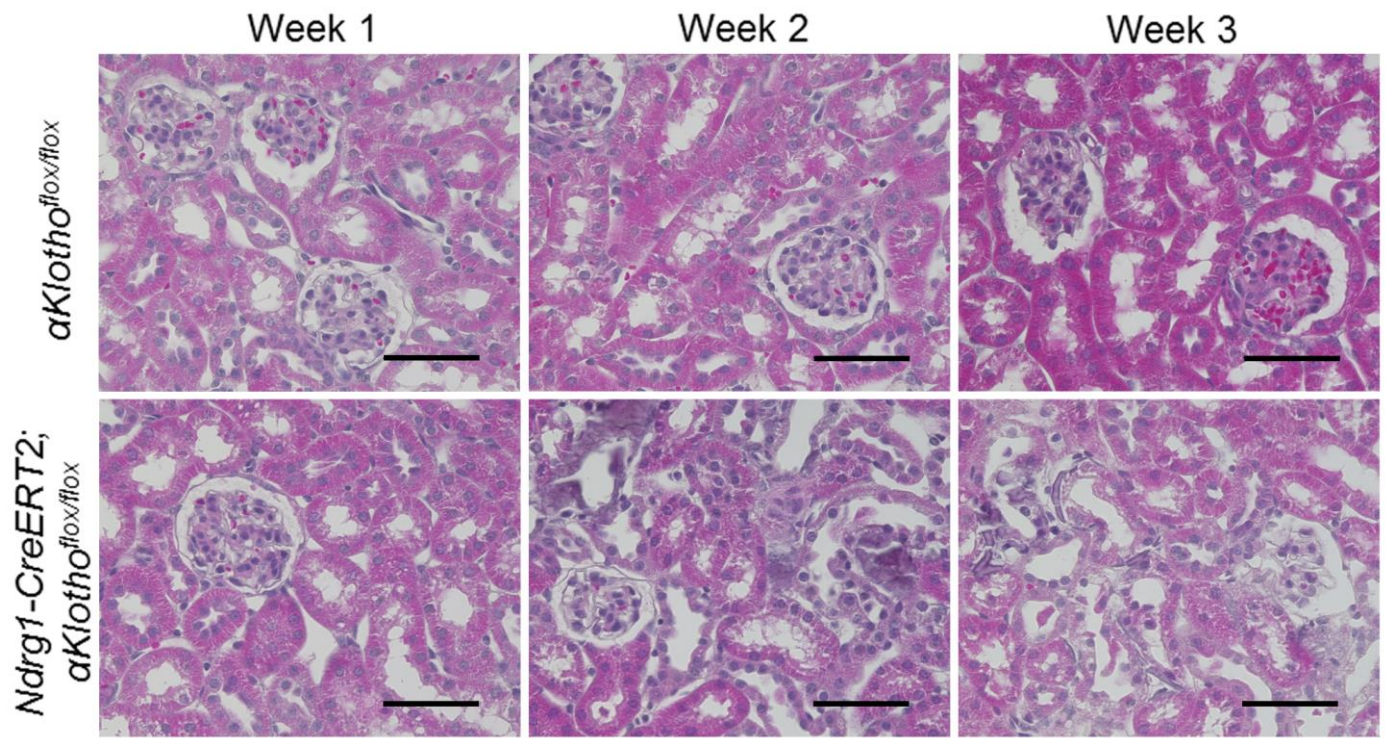

Supplementary Figure S1. HE staining of the kidney sections from  $\alpha Klotho^{flox/flox}$  and  $Ndr1-CreERT2; \alpha Klotho^{flox/flox}$  mice at 1, 2, and 3 weeks after tamoxifen treatment. The structure of renal tubules remained apparently normal at 1 week after tamoxifen treatment, whereas the treatment caused morphological disassembly of kidney tubules and glomeruli after 2 and 3 weeks. Scale bars: 50  $\mu m$ .

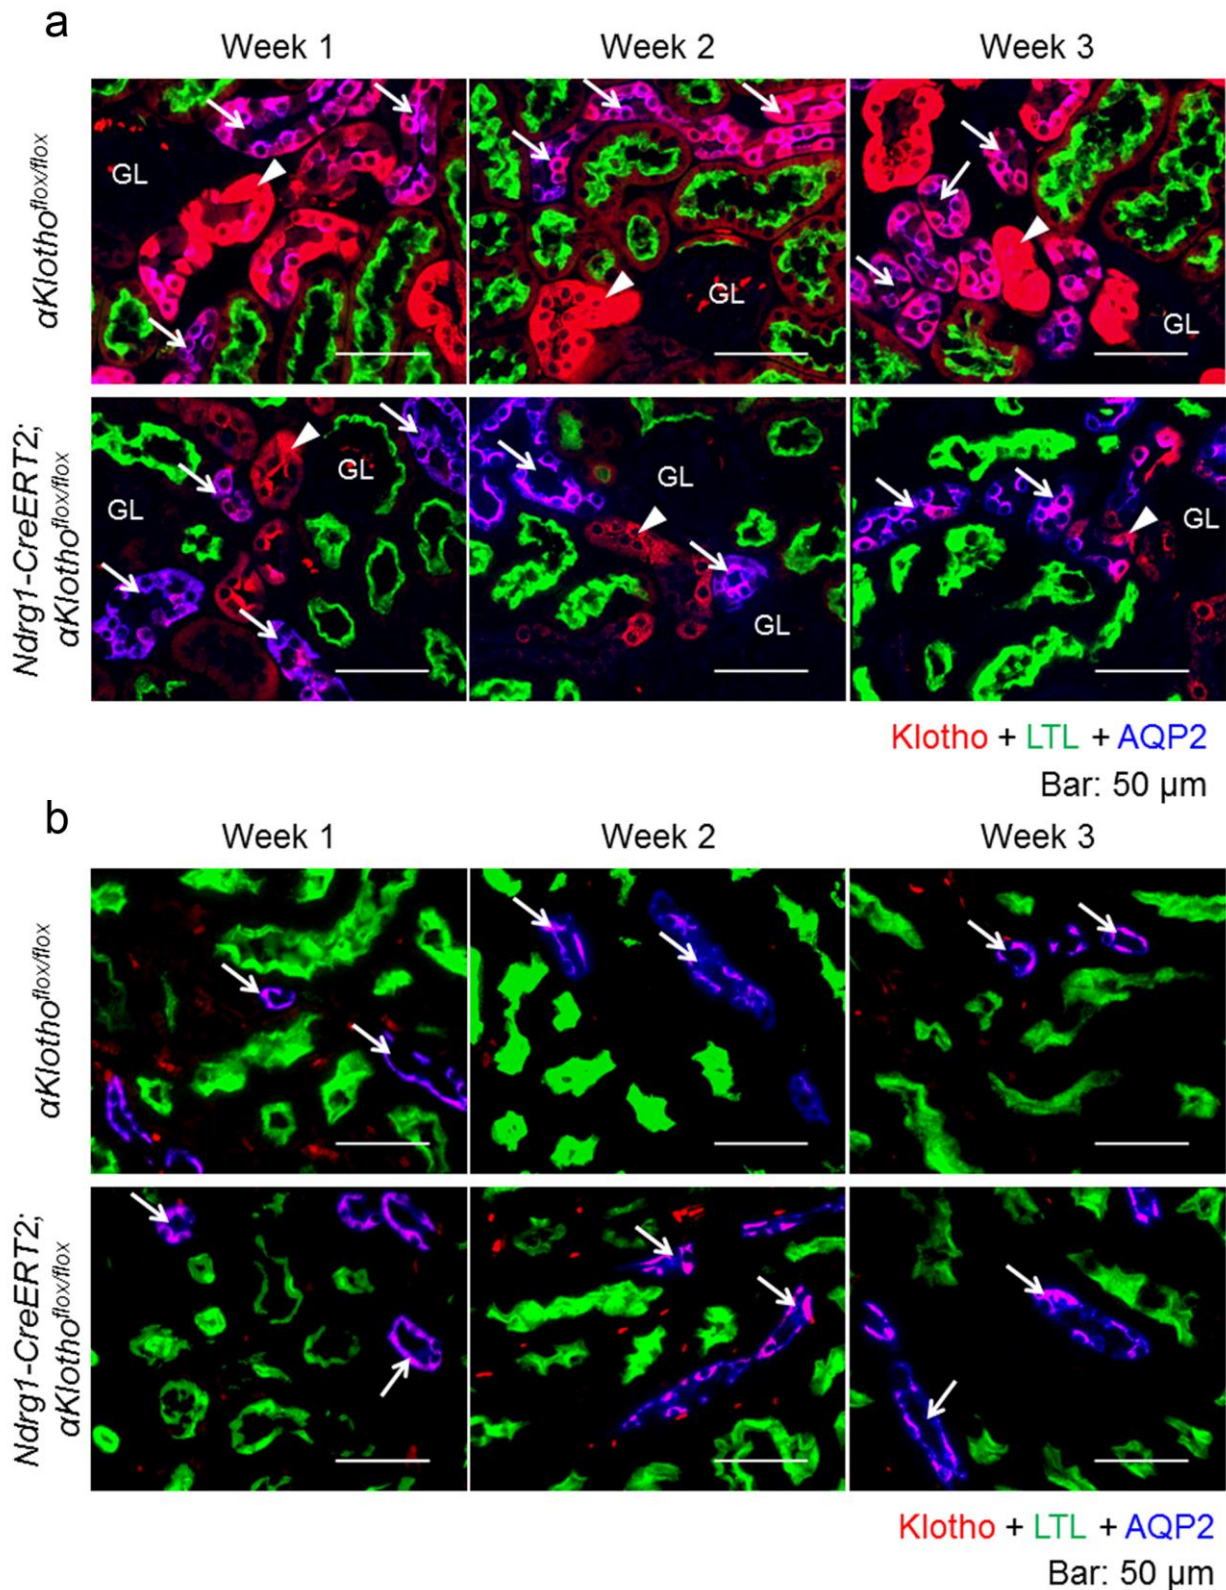

Supplementary Figure S2. Expression of  $\alpha$ Klotho in the kidney cortex (a) and corticomedullary boundary zone (b) of  $\alpha$ Klotho<sup>flx/flx</sup> and *Ndr*g1-CreERT2; $\alpha$ Klotho<sup>flx/flx</sup> mice at 1, 2, and 3 weeks after tamoxifen treatment. Kidney sections were co-stained for  $\alpha$ Klotho and aquaporin 2 (AQP2; a marker for collecting ducts shown in blue) with affinity marking of renal tubules with lotus tetragonolobus lectin (LTL, green). LTL+ cells in the cortex are mostly proximal tubular cells, whereas most LTL+ cells in the boundary zone represent cells of descending limb of Henle's loop, which appears negative for  $\alpha$ Klotho. Arrowheads in (a) indicate distal convoluted tubules expressing  $\alpha$ Klotho. In both portions of the nephron, *Ndr*g1-CreERT2 induction did not change  $\alpha$ Klotho expression in collecting ducts (arrows). GL: glomerulus. Scale bars: 50  $\mu$ m.



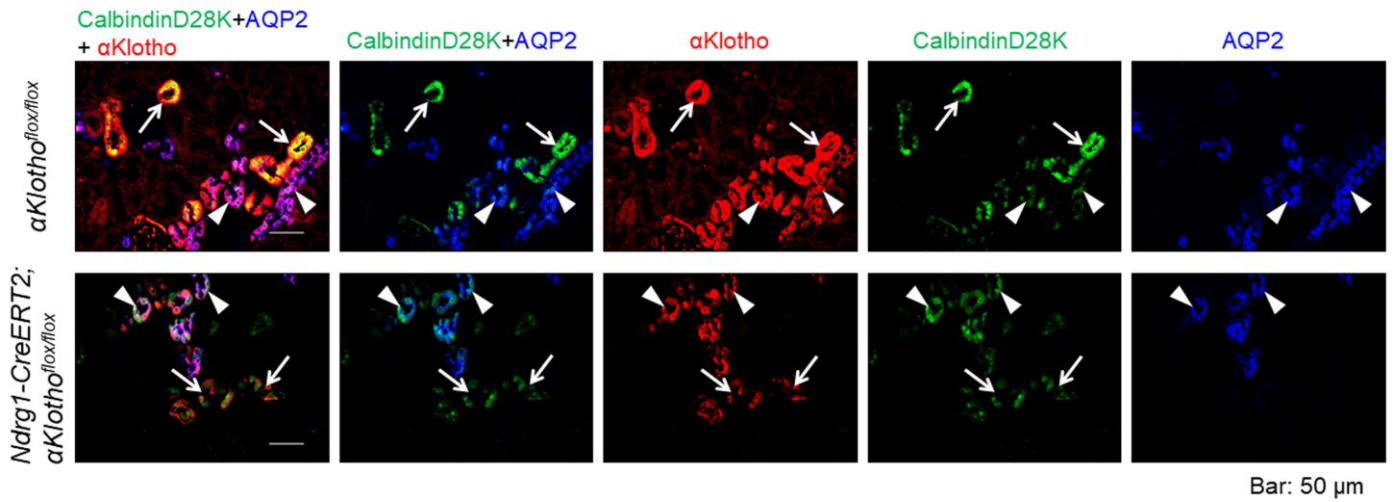

Supplementary Figure S3. Expression of  $\alpha$ Klotho in distal convoluted tubules and connecting tubules in  $\alpha$ Klotho<sup>flox/flox</sup> and Ndr<sup>g1</sup>-CreERT2; $\alpha$ Klotho<sup>flox/flox</sup> mice at 3 weeks after tamoxifen treatment. Kidney sections were co-stained for  $\alpha$ Klotho (red), calbindinD28K (a marker for distal convoluted tubules shown in green) and aquaporin 2 (AQP2; a marker for collecting ducts shown in blue). Arrows indicate distal convoluted tubules labeled only with calbindinD28K, whereas arrowheads indicate connecting tubules labeled with both calbindinD28K and AQP2. Tamoxifen treatment disassembled the cells of distal convoluted tubules and decreased their  $\alpha$ Klotho expression, but barely altered the structure or  $\alpha$ Klotho expression of connecting tubules.

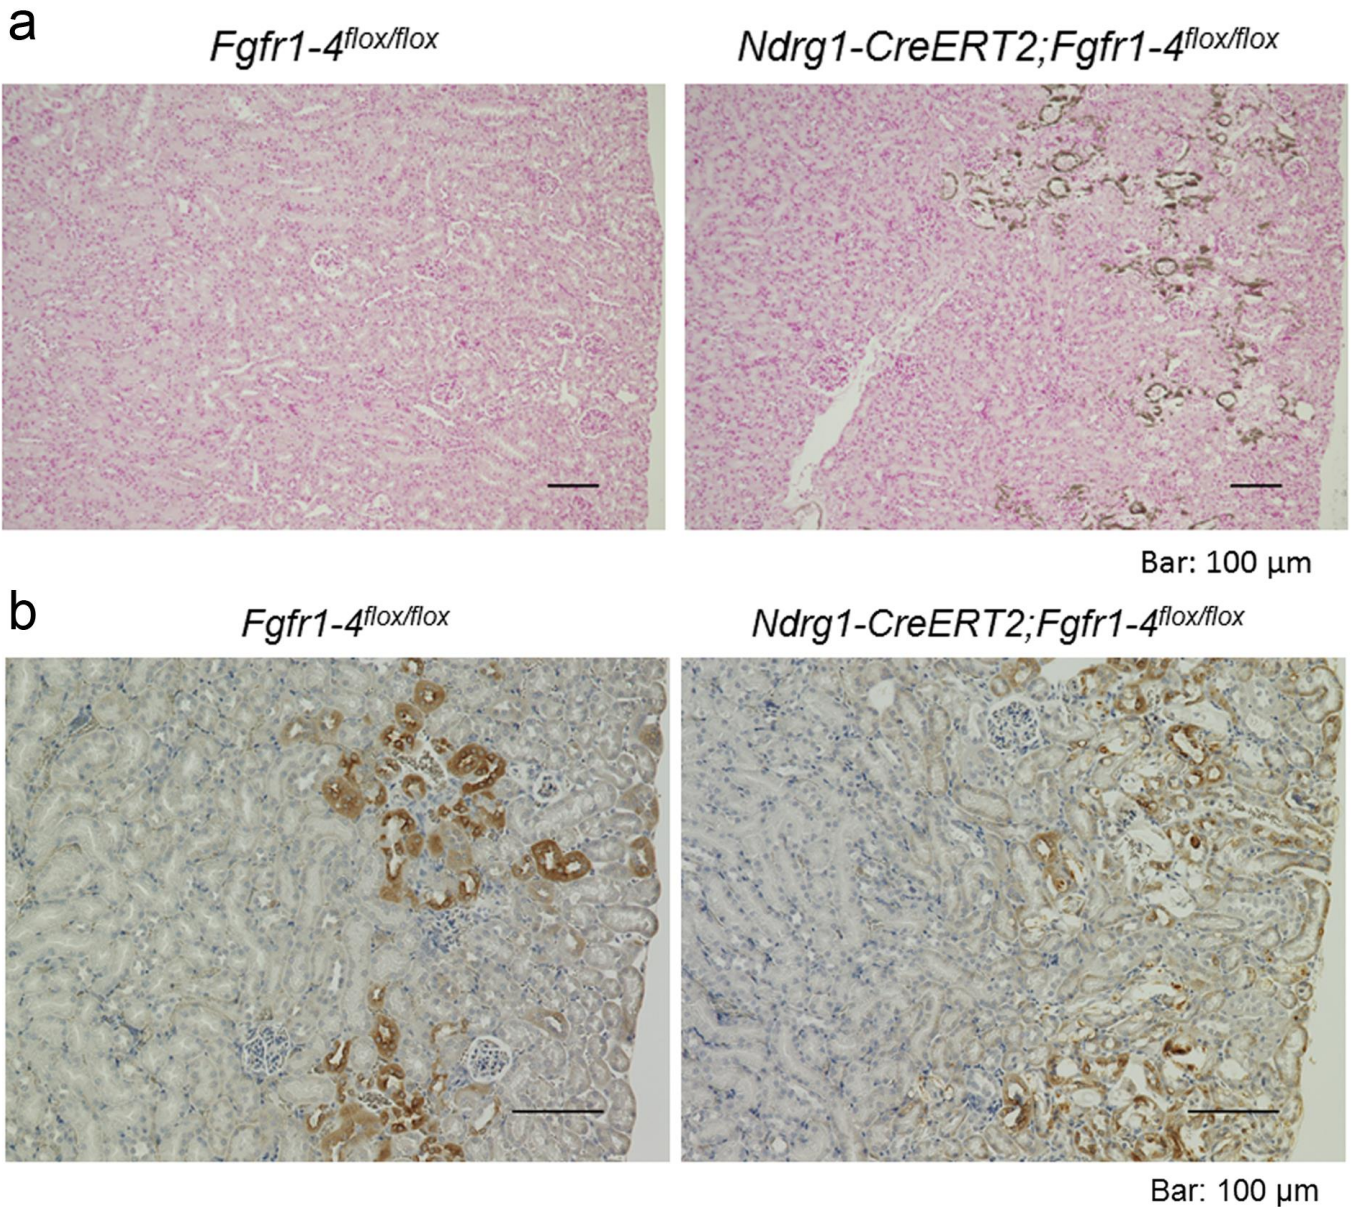

Supplementary Figure S4. Detection of ectopic calcification and  $\alpha$ Klotho expression in the kidney sections of *Fgfr1-4<sup>flox/flox</sup>* and *NdrG1-CreERT2;Fgfr1-4<sup>flox/flox</sup>* mice 3 weeks after tamoxifen treatment. a. Calcified tissue (dark brown) in the kidney. Kidney sections were stained for calcified tissue using the von Kossa method with counterstaining by nuclear fast red. A large amount of calcified tissue was formed in only the cortex area of *NdrG1-CreERT2;Fgfr1-4<sup>flox/flox</sup>* mice after tamoxifen treatment. Kidney cortical surface is oriented to the right. b. DAB staining for  $\alpha$ Klotho (dark brown) in the kidney cortex of *Fgfr1-4<sup>flox/flox</sup>* and *NdrG1-CreERT2;Fgfr1-4<sup>flox/flox</sup>* mice after tamoxifen treatment. Kidney sections were immunostained for  $\alpha$ Klotho with counterstaining by hematoxylin. In control *Fgfr1-4<sup>flox/flox</sup>* mice, distal convoluted tubules stained strongly positive, whereas proximal tubules stained mildly positive. In *NdrG1-CreERT2;Fgfr1-4<sup>flox/flox</sup>* mice, the kidney cortex had a number of non-stained areas with decreased staining for  $\alpha$ Klotho in distal convoluted tubules.  $\alpha$ Klotho expression remained unchanged in proximal tubules. Kidney cortical surface is oriented to the right. The same experiments were repeated in 3 different litters using a pair of littermates with and without *NdrG1-CreERT2* transgene under the C57BL/6J *Fgfr1-4<sup>flox/flox</sup>* background. Shown are the representative micrographs.



Without anti- $\alpha$ Klotho Ab

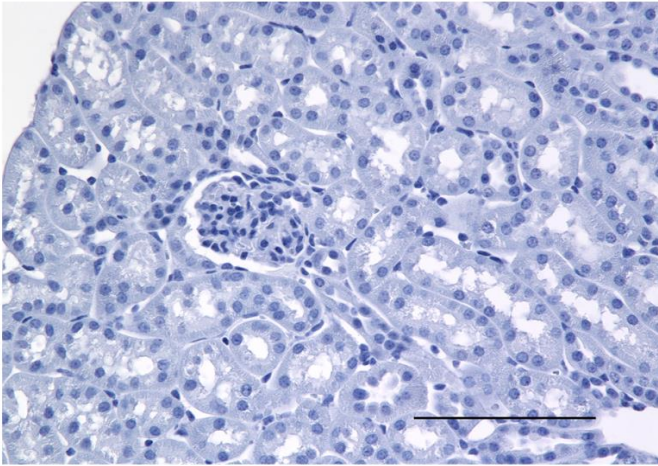

With anti- $\alpha$ Klotho Ab

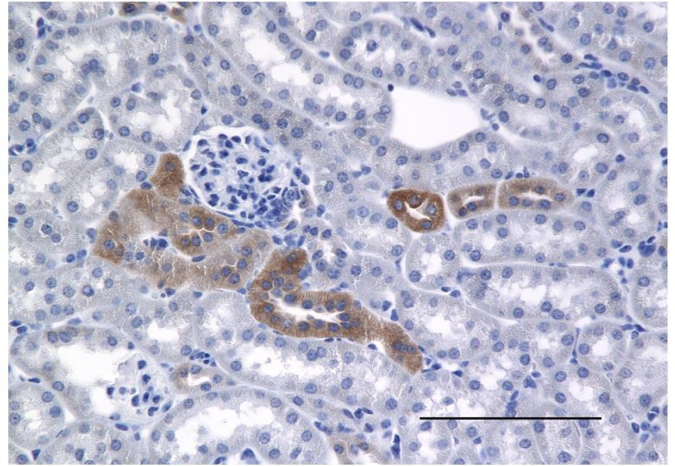

Supplementary Figure S5. Specificity of anti- $\alpha$  Klotho antibody used in our study. Kidney sections were incubated with or without an anti- $\alpha$ Klotho antibody (#KO603; Transgenic Inc., Ltd.), and detected by staining with 3,3'-diaminobenzidine (DAB) substrate (Nakalai Chemicals Ltd., Kyoto, Japan) and counterstaining with hematoxylin using the standard technique. Background without the primary anti- $\alpha$ Klotho antibody does not show any brown coloring. Distal tubules express abundant  $\alpha$ Klotho and are stained in dark brown while proximal tubules express modest amount of  $\alpha$ Klotho and are stained in light brown. Scale bars: 100  $\mu$ m.

Supplementary Table S1. Plasma biochemistry and micro-CT analysis of *αKlotho* flox mice without tamoxifen treatment.

Plasma biochemistry

|                                 | <i>αKlotho</i> <sup>flox/flox</sup> | <i>Ndr1-CreERT2; αKlotho</i> <sup>flox/flox</sup> | P value |
|---------------------------------|-------------------------------------|---------------------------------------------------|---------|
| Pi (mg/dL)                      | 6.33 ± 1.10 (n = 10)                | 6.55 ± 1.29 (n = 11)                              | 0.68    |
| Ca (mg/dL)                      | 8.76 ± 0.25 (n = 10)                | 8.35 ± 0.70 (n = 11)                              | 0.10    |
| PTH (pg/mL)                     | 234.84 ± 187.69 (n = 8)             | 167.51 ± 73.74 (n = 8)                            | 0.36    |
| FGF23 (pg/mL)                   | 200.55 ± 49.55 (n = 8)              | 205.92 ± 56.71 (n = 6)                            | 0.85    |
| 1,25(OH) <sub>2</sub> D (pg/mL) | 39.22 ± 24.48 (n = 4)               | 38.57 ± 19.61 (n = 4)                             | 0.97    |

Micro-CT analysis of the femur

|                           | <i>αKlotho</i> <sup>flox/flox</sup> | <i>Ndr1-CreERT2; αKlotho</i> <sup>flox/flox</sup> | P value |
|---------------------------|-------------------------------------|---------------------------------------------------|---------|
| BMD (mg/cm <sup>3</sup> ) | 549.3 ± 26.3 (n = 10)               | 561.9 ± 43.2 (n = 10)                             | 0.44    |

Pi, inorganic phosphate; Ca, calcium; PTH, parathyroid hormone; FGF23, fibroblast growth factor 23; 1,25(OH)<sub>2</sub>D, 1,25-dihydroxyvitamin D; BMD, bone mineral density; CT, computed tomography.

Supplementary Table S2. Plasma biochemistry, body size, and micro-CT analysis of heterozygous  $\alpha$ Klotho flox mice with tamoxifen treatment.

Plasma biochemistry

|                                 | $\alpha$ Klotho <sup>flox/+</sup> | <i>Ndr</i> g1-CreERT2; $\alpha$ Klotho <sup>flox/+</sup> | P value |
|---------------------------------|-----------------------------------|----------------------------------------------------------|---------|
| Pi (mg/dL)                      | 6.62 ± 0.87 (n = 11)              | 6.75 ± 0.89 (n = 13)                                     | 0.73    |
| Ca (mg/dL)                      | 8.56 ± 0.23 (n = 11)              | 8.59 ± 0.55 (n = 13)                                     | 0.87    |
| PTH (pg/mL)                     | 221.30 ± 139.59 (n = 8)           | 174.57 ± 98.09 (n = 8)                                   | 0.45    |
| FGF23 (pg/mL)                   | 133.90 ± 45.67 (n = 8)            | 138.80 ± 51.01 (n = 8)                                   | 0.84    |
| 1,25(OH) <sub>2</sub> D (pg/mL) | 64.28 ± 23.84 (n = 4)             | 46.54 ± 8.69 (n = 4)                                     | 0.21    |

Body size

|                               | $\alpha$ Klotho <sup>flox/+</sup> | <i>Ndr</i> g1-CreERT2; $\alpha$ Klotho <sup>flox/+</sup> | P value |
|-------------------------------|-----------------------------------|----------------------------------------------------------|---------|
| Female BW before Tamo         | 18.30 ± 0.96 (n=6)                | 17.32 ± 0.53 (n=6)                                       | 0.052   |
| Female BW (g) after Tamo      | 20.32 ± 1.50 (n = 6)              | 19.50 ± 0.97 (n = 8)                                     | 0.24    |
| Female length (mm) after Tamo | 90.17 ± 1.47 (n = 6)              | 88.63 ± 1.60 (n = 8)                                     | 0.090   |
| Male BW (g) before Tamo       | 21.56 ± 0.76 (n = 5)              | 20.95 ± 1.44 (n = 6)                                     | 0.42    |
| Male BW (g) after Tamo        | 24.38 ± 1.14 (n=5)                | 23.65 ± 1.65 (n= 6)                                      | 0.42    |
| Male length (mm) after Tamo   | 24.38 ± 1.14 (n = 5)              | 23.65 ± 1.65 (n = 6)                                     | 0.43    |

Micro-CT analysis of the femur

|                           | $\alpha$ Klotho <sup>flox/+</sup> | <i>Ndr</i> g1-CreERT2; $\alpha$ Klotho <sup>flox/+</sup> | P value |
|---------------------------|-----------------------------------|----------------------------------------------------------|---------|
| BMD (mg/cm <sup>3</sup> ) | 625.0 ± 20.6 (n = 7)              | 620.5 ± 15.7 (n = 7)                                     | 0.66    |

Pi, inorganic phosphate; Ca, calcium; PTH, parathyroid hormone; FGF23, fibroblast growth factor 23; 1,25(OH)<sub>2</sub>D, 1,25-dihydroxyvitamin D; BW, body weight; length, nose-to-anus length; BMD, bone mineral density; CT, computed tomography; Tamo, tamoxifen treatment.



Supplementary Table S3. Plasma biochemistry, body size, and micro-CT analysis of *Fgfr1-4* flox mice without tamoxifen treatment.

Plasma biochemistry

|                                 | <i>Fgfr1-4</i> <sup>flox/flox</sup> | <i>Ndr1-CreERT2;Fgfr1-4</i> <sup>flox/flox</sup> | P value |
|---------------------------------|-------------------------------------|--------------------------------------------------|---------|
| Pi (mg/dL)                      | 7.83 ± 1.46 (n = 13)                | 7.79 ± 1.92 (n = 13)                             | 0.95    |
| Ca (mg/dL)                      | 9.22 ± 0.82 (n = 13)                | 8.74 ± 0.62 (n = 13)                             | 0.10    |
| PTH (pg/mL)                     | 607.31 ± 454.44 (n = 6)             | 481.15 ± 114.84 (n = 8)                          | 0.53    |
| FGF23 (pg/mL)                   | 157.79 ± 55.79 (n = 8)              | 144.73 ± 41.96 (n = 8)                           | 0.61    |
| 1,25(OH) <sub>2</sub> D (pg/mL) | 51.38 ± 21.91 (n = 4)               | 47.27 ± 6.16 (n = 4)                             | 0.73    |

Body size

|               | <i>Fgfr1-4</i> <sup>flox/flox</sup> | <i>Ndr1-CreERT2;Fgfr1-4</i> <sup>flox/flox</sup> | P value |
|---------------|-------------------------------------|--------------------------------------------------|---------|
| Female BW (g) | 21.17 ± 1.55 (n = 7)                | 20.59 ± 1.24 (n = 5)                             | 0.50    |
| Male BW (g)   | 26.80 ± 3.32 (n = 6)                | 27.69 ± 1.84 (n = 8)                             | 0.53    |

Micro-CT analysis of the femur

|                           | <i>Fgfr1-4</i> <sup>flox/flox</sup> | <i>Ndr1-CreERT2;Fgfr1-4</i> <sup>flox/flox</sup> | P value |
|---------------------------|-------------------------------------|--------------------------------------------------|---------|
| BMD (mg/cm <sup>3</sup> ) | 579.6 ± 36.5 (n = 10)               | 584.9 ± 45.3 (n = 10)                            | 0.78    |

Pi, inorganic phosphate; Ca, calcium; PTH, parathyroid hormone; 1,25(OH)<sub>2</sub>D, 1,25-dihydroxyvitamin D; BW, body weight; BMD, bone mineral density; CT, computed tomography.

Supplementary Table S4. Primers used for RT-qPCR. Related to Experimental Procedures, RT-qPCR.

| Name           | Forward primer           | Reverse primer           |
|----------------|--------------------------|--------------------------|
| <i>aKlotho</i> | CCCGATGTATGTGACAGCCAATGG | CTTGGGAGCTGAGCGATCACTAAG |
| <i>Gapdh</i>   | ACCCAGAAGACTGTGGATGG     | GGATGCAGGGATGATGTTCT     |
| <i>Cyp27b1</i> | ATGGTGAAGAATGGCAGAGG     | TTAGTCGTCCGACAAGGTCA     |
| <i>Cyp24a1</i> | TGGTGCGGATTTCCCTTTGT     | AGCTGTTTGCGGTCGTCTC      |
| <i>Npt2a</i>   | GCTGTCCTCTACCTGCTCGTGTG  | GCGTGCCCACTCCGACCATAG    |
| <i>Npt2c</i>   | TGTGGGTACTIONTCGATCACCA  | TGTGAGCCAGTTGAAGATGC     |
| <i>Fgfr1</i>   | TCACCGCTCTACCTGGAGAT     | GGAAGTCGCTCTTCTTGGTG     |
| <i>Fgfr2</i>   | GAGTTGCCAGAGGATCCAAA     | GACTACTTGCCCGAAGCAAC     |
| <i>Fgfr3</i>   | CACCGACAAGGAGCTAGAGG     | ACGCAGAGTGATGGGAAAAC     |
| <i>Fgfr4</i>   | CGCCAGCCTGTCACTATACAAA   | CCAGAGGACCTCGACTCCAA     |
